# Supplementary material
Source: PubMed Central journal article supplement (PMC9308469)
Supplement: NIHMS1798362-supplement-1.pdf [file NIHMS1798362-supplement-1.pdf]

**Supplementary Table S1 (A).** List of 60 AML dependencies identified in the CRISPR (Avana) 20Q3 public Ceres data on 789 cell lines. Data analysis was performed based on the Empirical Bayes Statistics for differential dependency of the 21 AML cell lines vs. all other 768 cell lines. Significance cut-offs: effect size  $\leq -0.3$ , adjusted p-value  $\leq 0.10$ .

| Rank | Gene (Entrez ID) | Effect size | p-value | adj. p-value |
|------|------------------|-------------|---------|--------------|
| 1    | MYB (4602)       | -0.89       | 8.7E-60 | 1.6E-55      |
| 2    | CBFB (865)       | -0.77       | 6.4E-21 | 1.7E-17      |
| 3    | SPI1 (6688)      | -0.63       | 1.2E-48 | 1.1E-44      |
| 4    | LMO2 (4005)      | -0.57       | 2.3E-44 | 1.4E-40      |
| 5    | RUNX1 (861)      | -0.56       | 2.6E-20 | 5.8E-17      |
| 6    | ZEB2 (9839)      | -0.56       | 1.5E-19 | 2.5E-16      |
| 7    | CDK6 (1021)      | -0.54       | 1.1E-08 | 3.5E-06      |
| 8    | MED1 (5469)      | -0.52       | 1.6E-07 | 3.5E-05      |
| 9    | NAMPT (10135)    | -0.51       | 1.5E-10 | 7.8E-08      |
| 10   | MARCH5 (54708)   | -0.51       | 1.8E-09 | 6.8E-07      |
| 11   | IRF2BP2 (359948) | -0.49       | 1.5E-16 | 1.8E-13      |
| 12   | LDB1 (8861)      | -0.48       | 1.1E-15 | 1.1E-12      |
| 13   | DNM2 (1785)      | -0.47       | 5.7E-09 | 2.1E-06      |
| 14   | TSC2 (7249)      | -0.45       | 7.5E-05 | 4.4E-03      |
| 15   | SLC5A3 (6526)    | -0.44       | 3.0E-26 | 1.1E-22      |
| 16   | TAZ (6901)       | -0.44       | 3.7E-12 | 2.5E-09      |
| 17   | CCND3 (896)      | -0.43       | 5.0E-13 | 3.6E-10      |
| 18   | RRM2 (6241)      | -0.41       | 4.0E-11 | 2.1E-08      |
| 19   | MED24 (9862)     | -0.41       | 3.3E-08 | 9.2E-06      |
| 20   | ATP1B3 (483)     | -0.41       | 2.7E-11 | 1.5E-08      |
| 21   | AP2S1 (1175)     | -0.39       | 4.2E-08 | 1.1E-05      |
| 22   | MYC (4609)       | -0.39       | 1.0E-05 | 1.0E-03      |
| 23   | GFI1 (2672)      | -0.39       | 4.5E-28 | 2.0E-24      |
| 24   | ADSL (158)       | -0.38       | 1.1E-05 | 1.2E-03      |
| 25   | FAM50A (9130)    | -0.38       | 7.1E-05 | 4.3E-03      |
| 26   | WNK1 (65125)     | -0.38       | 2.8E-07 | 5.7E-05      |
| 27   | CFL1 (1072)      | -0.37       | 1.8E-07 | 3.8E-05      |
| 28   | IPPK (64768)     | -0.37       | 1.5E-08 | 4.5E-06      |
| 29   | YRDC (79693)     | -0.36       | 1.0E-03 | 2.5E-02      |
| 30   | RAF1 (5894)      | -0.36       | 1.9E-08 | 5.5E-06      |
| 31   | CDAN1 (146059)   | -0.36       | 5.3E-05 | 3.6E-03      |
| 32   | FLI1 (2313)      | -0.36       | 7.9E-15 | 7.2E-12      |
| 33   | TRPM7 (54822)    | -0.36       | 1.7E-05 | 1.5E-03      |
| 34   | SS18L2 (51188)   | -0.36       | 1.1E-09 | 4.5E-07      |
| 35   | TFRC (7037)      | -0.35       | 2.8E-05 | 2.2E-03      |
| 36   | GSE1 (23199)     | -0.35       | 5.5E-20 | 1.1E-16      |
| 37   | MICU1 (10367)    | -0.35       | 6.4E-25 | 1.9E-21      |

| Rank | Gene (Entrez ID) | Effect size | p-value | adj. p-value |
|------|------------------|-------------|---------|--------------|
| 38   | UMPS (7372)      | -0.34       | 4.3E-06 | 5.3E-04      |
| 39   | CEBPA (1050)     | -0.34       | 1.9E-15 | 1.9E-12      |
| 40   | RHOA (387)       | -0.34       | 1.5E-05 | 1.4E-03      |
| 41   | SEPHS2 (22928)   | -0.33       | 8.2E-04 | 2.2E-02      |
| 42   | FBXO7 (25793)    | -0.33       | 2.6E-11 | 1.5E-08      |
| 43   | SDHB (6390)      | -0.33       | 2.7E-05 | 2.1E-03      |
| 44   | CDS2 (8760)      | -0.33       | 7.3E-09 | 2.4E-06      |
| 45   | ZFP36L2 (678)    | -0.33       | 2.0E-12 | 1.4E-09      |
| 46   | TSC1 (7248)      | -0.33       | 8.7E-04 | 2.3E-02      |
| 47   | GFPT1 (2673)     | -0.32       | 9.8E-07 | 1.6E-04      |
| 48   | CMIP (80790)     | -0.32       | 3.3E-07 | 6.5E-05      |
| 49   | EMC3 (55831)     | -0.32       | 4.4E-06 | 5.4E-04      |
| 50   | MINOS1 (440574)  | -0.32       | 1.1E-06 | 1.7E-04      |
| 51   | BCL2 (596)       | -0.32       | 4.6E-13 | 3.5E-10      |
| 52   | EP300 (2033)     | -0.32       | 2.1E-03 | 3.9E-02      |
| 53   | IRF8 (3394)      | -0.31       | 1.8E-18 | 2.7E-15      |
| 54   | SLC7A1 (6541)    | -0.31       | 4.3E-06 | 5.3E-04      |
| 55   | PPCDC (60490)    | -0.31       | 2.7E-07 | 5.6E-05      |
| 56   | STAG2 (10735)    | -0.31       | 1.0E-03 | 2.5E-02      |
| 57   | SMC1A (8243)     | -0.31       | 2.3E-11 | 1.4E-08      |
| 58   | STK11 (6794)     | -0.30       | 4.1E-05 | 2.9E-03      |
| 59   | DTYMK (1841)     | -0.30       | 1.6E-04 | 7.6E-03      |
| 60   | MCL1 (4170)      | -0.30       | 2.2E-04 | 9.6E-03      |

**Supplementary Table S1 (B).** List of 54 AML dependencies identified in the Combined RNAi (Broad, Novartis, Marcotte) 20Q3 public Demeter2 data on 712 cell lines. Data analysis was performed based on the Empirical Bayes Statistics for differential dependency of the 23 AML cell lines vs. all other 689 cell lines. Significance cut-offs: effect size  $\leq -0.3$ , adjusted p-value  $\leq 0.10$ .

| Rank | Gene (Entrez ID)   | Effect size | p-value | adj. p-value |
|------|--------------------|-------------|---------|--------------|
| 1    | CBFB (865)         | -0.82       | 1.1E-64 | 2.0E-60      |
| 2    | MYB (4602)         | -0.76       | 6.6E-56 | 5.7E-52      |
| 3    | MED1 (5469)        | -0.54       | 8.0E-12 | 5.3E-09      |
| 4    | FLI1 (2313)        | -0.51       | 1.5E-30 | 8.7E-27      |
| 5    | COQ10B (80219)     | -0.48       | 1.5E-04 | 3.5E-03      |
| 6    | RUNX1 (861)        | -0.47       | 2.6E-26 | 7.6E-23      |
| 7    | CDC26 (246184)     | -0.47       | 5.9E-03 | 4.6E-02      |
| 8    | MYBL2 (4605)       | -0.47       | 1.5E-08 | 3.3E-06      |
| 9    | MED19 (219541)     | -0.46       | 1.4E-16 | 2.1E-13      |
| 10   | RCOR1 (23186)      | -0.44       | 3.0E-15 | 3.7E-12      |
| 11   | KDM1A (23028)      | -0.43       | 5.2E-16 | 6.9E-13      |
| 12   | CFL1 (1072)        | -0.43       | 1.4E-09 | 4.6E-07      |
| 13   | ORMDL3 (94103)     | -0.43       | 9.5E-04 | 1.3E-02      |
| 14   | RTN2 (6253)        | -0.42       | 4.0E-03 | 3.5E-02      |
| 15   | ERLIN2 (11160)     | -0.41       | 6.6E-04 | 9.9E-03      |
| 16   | MGAT4D (152586)    | -0.41       | 2.6E-03 | 2.7E-02      |
| 17   | SDCCAG8 (10806)    | -0.41       | 3.8E-03 | 3.4E-02      |
| 18   | REG3G (130120)     | -0.40       | 1.0E-02 | 6.8E-02      |
| 19   | A2ML1 (144568)     | -0.40       | 1.9E-13 | 1.8E-10      |
| 20   | PTPN11 (5781)      | -0.40       | 9.3E-12 | 5.9E-09      |
| 21   | BPIFB6 (128859)    | -0.39       | 3.1E-03 | 3.0E-02      |
| 22   | EDRF1 (26098)      | -0.39       | 9.3E-03 | 6.3E-02      |
| 23   | SPI1 (6688)        | -0.39       | 6.9E-28 | 3.0E-24      |
| 24   | DNAJC5G (285126)   | -0.38       | 1.6E-02 | 9.1E-02      |
| 25   | IGFL4 (444882)     | -0.38       | 1.3E-03 | 1.7E-02      |
| 26   | C10orf111 (221060) | -0.38       | 1.7E-03 | 1.9E-02      |
| 27   | OGDH (4967)        | -0.37       | 1.5E-09 | 4.8E-07      |
| 28   | SLC9B2 (133308)    | -0.37       | 6.9E-03 | 5.2E-02      |
| 29   | C10orf71 (118461)  | -0.37       | 5.2E-03 | 4.3E-02      |
| 30   | SENP1 (29843)      | -0.36       | 6.0E-12 | 4.3E-09      |
| 31   | FAM217B (63939)    | -0.36       | 3.9E-03 | 3.5E-02      |
| 32   | UPK3BL2 (10798399) | -0.36       | 2.2E-06 | 1.5E-04      |
| 33   | CERCAM (51148)     | -0.34       | 1.3E-02 | 7.8E-02      |
| 34   | ERRFI1 (54206)     | -0.34       | 6.4E-03 | 4.9E-02      |
| 35   | SPACA6 (147650)    | -0.34       | 4.9E-03 | 4.1E-02      |
| 36   | FAM45BP (55855)    | -0.33       | 9.2E-03 | 6.2E-02      |
| 37   | FAM117A (81558)    | -0.33       | 9.8E-03 | 6.5E-02      |
| 38   | ESPNL (339768)     | -0.32       | 1.5E-10 | 7.9E-08      |

| Rank | Gene (Entrez ID)    | Effect size | p-value | adj. p-value |
|------|---------------------|-------------|---------|--------------|
| 39   | HYDIN2 (100288805)  | -0.32       | 1.4E-02 | 8.4E-02      |
| 40   | EFCAB5 (374786)     | -0.32       | 7.0E-03 | 5.2E-02      |
| 41   | FER1L6-AS2 (157376) | -0.32       | 3.4E-03 | 3.2E-02      |
| 42   | MMGT1 (93380)       | -0.32       | 3.0E-03 | 2.9E-02      |
| 43   | AURKB (9212)        | -0.32       | 9.3E-09 | 2.2E-06      |
| 44   | MED9 (55090)        | -0.31       | 3.3E-10 | 1.5E-07      |
| 45   | ATP1A1 (476)        | -0.31       | 5.4E-07 | 5.3E-05      |
| 46   | AMER1 (139285)      | -0.31       | 6.6E-05 | 2.0E-03      |
| 47   | PHEX (5251)         | -0.31       | 2.5E-10 | 1.2E-07      |
| 48   | RCCD1 (91433)       | -0.31       | 5.0E-06 | 2.8E-04      |
| 49   | CHMP4C (92421)      | -0.30       | 6.4E-06 | 3.3E-04      |
| 50   | C1orf116 (79098)    | -0.30       | 2.1E-07 | 2.6E-05      |
| 51   | LMO2 (4005)         | -0.30       | 2.1E-20 | 5.1E-17      |
| 52   | IRF2BP2 (359948)    | -0.30       | 2.9E-13 | 2.5E-10      |
| 53   | DNAJC30 (84277)     | -0.30       | 4.9E-03 | 4.1E-02      |
| 54   | PSIP1 (11168)       | -0.30       | 6.3E-12 | 4.4E-09      |

**Supplementary Table S1 (C).** List of 83 AML dependencies identified in the CRISPR (Sanger) 20Q3 public data on 318 cell lines. Data analysis was performed based on the Empirical Bayes Statistics for differential dependency of the 2 AML cell lines vs. all other 316 cell lines. Significance cut-offs: effect size  $\leq -0.3$ , adjusted p-value  $\leq 0.10$ .

| Rank | Gene (Entrez ID) | Effect size | p-value | adj. p-value |
|------|------------------|-------------|---------|--------------|
| 1    | CCND3 (896)      | -1.32       | 1.3E-12 | 2.6E-09      |
| 2    | CEBPA (1050)     | -1.12       | 2.8E-31 | 4.9E-27      |
| 3    | MYB (4602)       | -1.11       | 7.7E-19 | 3.4E-15      |
| 4    | SPI1 (6688)      | -1.06       | 2.8E-26 | 1.7E-22      |
| 5    | CBFB (865)       | -1.06       | 2.7E-10 | 4.4E-07      |
| 6    | STK11 (6794)     | -1.03       | 1.2E-06 | 7.0E-04      |
| 7    | IRF8 (3394)      | -1.00       | 4.0E-29 | 3.5E-25      |
| 8    | MED16 (10025)    | -0.90       | 3.1E-07 | 2.1E-04      |
| 9    | ZEB2 (9839)      | -0.88       | 2.7E-15 | 7.0E-12      |
| 10   | ZMYND8 (23613)   | -0.86       | 7.8E-08 | 7.7E-05      |
| 11   | MED23 (9439)     | -0.81       | 6.8E-05 | 2.0E-02      |
| 12   | RPS6KA1 (6195)   | -0.77       | 2.2E-17 | 7.8E-14      |
| 13   | ATP1B3 (483)     | -0.76       | 7.2E-07 | 4.6E-04      |
| 14   | MEN1 (4221)      | -0.76       | 8.6E-08 | 8.1E-05      |
| 15   | IRF2BP2 (359948) | -0.75       | 6.9E-06 | 3.0E-03      |
| 16   | PSIP1 (11168)    | -0.74       | 1.7E-12 | 2.9E-09      |
| 17   | MEF2D (4209)     | -0.74       | 2.3E-13 | 5.1E-10      |
| 18   | MBNL1 (4154)     | -0.72       | 4.3E-08 | 4.8E-05      |
| 19   | COQ10B (80219)   | -0.71       | 1.8E-08 | 2.2E-05      |
| 20   | PTPN7 (5778)     | -0.71       | 3.5E-17 | 1.1E-13      |
| 21   | FPGS (2356)      | -0.71       | 4.9E-04 | 9.4E-02      |
| 22   | COX6B1 (1340)    | -0.68       | 4.3E-06 | 2.0E-03      |
| 23   | CS (1431)        | -0.67       | 1.3E-07 | 1.1E-04      |
| 24   | NDUFC2 (4718)    | -0.66       | 1.8E-04 | 4.2E-02      |
| 25   | CITED2 (10370)   | -0.65       | 4.0E-09 | 5.4E-06      |
| 26   | NDUFA13 (51079)  | -0.65       | 9.1E-05 | 2.5E-02      |
| 27   | SLC5A3 (6526)    | -0.65       | 2.5E-06 | 1.3E-03      |
| 28   | SLC38A2 (54407)  | -0.65       | 1.4E-06 | 7.6E-04      |
| 29   | SETDB1 (9869)    | -0.62       | 1.2E-06 | 7.0E-04      |
| 30   | MLLT1 (4298)     | -0.62       | 2.3E-08 | 2.7E-05      |
| 31   | FBXO7 (25793)    | -0.60       | 4.6E-06 | 2.1E-03      |
| 32   | KDM5C (8242)     | -0.58       | 2.2E-05 | 8.9E-03      |
| 33   | KIAA0391 (9692)  | -0.57       | 7.2E-05 | 2.1E-02      |
| 34   | NDUFA1 (4694)    | -0.56       | 4.1E-05 | 1.4E-02      |
| 35   | BRD9 (65980)     | -0.56       | 3.0E-06 | 1.5E-03      |
| 36   | RUNX2 (860)      | -0.54       | 9.4E-06 | 3.8E-03      |
| 37   | COX18 (285521)   | -0.54       | 1.1E-07 | 9.5E-05      |
| 38   | HSD17B10 (3028)  | -0.54       | 2.1E-04 | 4.8E-02      |

| Rank | Gene (Entrez ID)   | Effect size | p-value | adj. p-value |
|------|--------------------|-------------|---------|--------------|
| 39   | CHD1 (1105)        | -0.53       | 8.1E-05 | 2.3E-02      |
| 40   | LMO2 (4005)        | -0.53       | 2.8E-07 | 1.9E-04      |
| 41   | MEF2C (4208)       | -0.53       | 2.1E-06 | 1.1E-03      |
| 42   | DAXX (1616)        | -0.53       | 2.1E-04 | 4.8E-02      |
| 43   | MRPS18B (28973)    | -0.52       | 1.2E-04 | 3.2E-02      |
| 44   | NDUFB8 (4714)      | -0.51       | 1.0E-04 | 2.7E-02      |
| 45   | HDAC8 (55869)      | -0.51       | 2.9E-06 | 1.5E-03      |
| 46   | COX4I1 (1327)      | -0.51       | 2.1E-04 | 4.8E-02      |
| 47   | NDUFA10 (4705)     | -0.51       | 3.9E-04 | 7.8E-02      |
| 48   | NDUFA9 (4704)      | -0.51       | 2.6E-04 | 5.7E-02      |
| 49   | BCL2 (596)         | -0.51       | 1.7E-04 | 4.2E-02      |
| 50   | ALAS1 (211)        | -0.50       | 4.3E-06 | 2.0E-03      |
| 51   | PDHA1 (5160)       | -0.50       | 5.3E-05 | 1.6E-02      |
| 52   | FASTKD5 (60493)    | -0.49       | 9.2E-06 | 3.8E-03      |
| 53   | COX15 (1355)       | -0.49       | 4.6E-05 | 1.5E-02      |
| 54   | DOT1L (84444)      | -0.48       | 4.5E-05 | 1.5E-02      |
| 55   | DCAF15 (90379)     | -0.48       | 2.9E-04 | 6.1E-02      |
| 56   | MPC2 (25874)       | -0.48       | 1.9E-07 | 1.4E-04      |
| 57   | COX5A (9377)       | -0.48       | 2.6E-04 | 5.7E-02      |
| 58   | PDSS1 (23590)      | -0.48       | 6.4E-05 | 2.0E-02      |
| 59   | MRPL54 (116541)    | -0.47       | 2.8E-04 | 5.8E-02      |
| 60   | MRPL14 (64928)     | -0.45       | 3.1E-05 | 1.1E-02      |
| 61   | SS18 (6760)        | -0.45       | 1.4E-06 | 7.6E-04      |
| 62   | COX11 (1353)       | -0.44       | 1.7E-04 | 4.2E-02      |
| 63   | SIK3 (23387)       | -0.44       | 2.5E-07 | 1.8E-04      |
| 64   | GTPBP8 (29083)     | -0.43       | 4.4E-04 | 8.9E-02      |
| 65   | ETS2 (2114)        | -0.43       | 2.4E-05 | 9.2E-03      |
| 66   | LYL1 (4066)        | -0.43       | 3.8E-05 | 1.4E-02      |
| 67   | EEF1E1 (9521)      | -0.42       | 1.8E-04 | 4.2E-02      |
| 68   | PET117 (100303755) | -0.42       | 5.3E-06 | 2.3E-03      |
| 69   | GFI1 (2672)        | -0.41       | 3.2E-09 | 4.7E-06      |
| 70   | PDSS2 (57107)      | -0.41       | 2.4E-04 | 5.3E-02      |
| 71   | PRKAA1 (5562)      | -0.40       | 9.2E-05 | 2.5E-02      |
| 72   | PIK3R5 (23533)     | -0.40       | 1.9E-07 | 1.4E-04      |
| 73   | ZFP64 (55734)      | -0.40       | 6.2E-08 | 6.5E-05      |
| 74   | SMARCD2 (6603)     | -0.40       | 2.5E-05 | 9.6E-03      |
| 75   | HOXA13 (3209)      | -0.40       | 1.6E-07 | 1.3E-04      |
| 76   | SLC25A36 (55186)   | -0.37       | 7.1E-06 | 3.0E-03      |
| 77   | DPP9 (91039)       | -0.37       | 9.0E-05 | 2.5E-02      |
| 78   | PIK3CG (5294)      | -0.36       | 4.3E-05 | 1.5E-02      |
| 79   | NCKAP1L (3071)     | -0.36       | 8.0E-05 | 2.3E-02      |
| 80   | AFF1 (4299)        | -0.36       | 1.0E-04 | 2.7E-02      |
| 81   | FOXP1 (27086)      | -0.34       | 1.1E-04 | 2.8E-02      |
| 82   | MAP2K2 (5605)      | -0.33       | 4.8E-05 | 1.5E-02      |
| 83   | SLC1A3 (6507)      | -0.30       | 4.6E-05 | 1.5E-02      |
