# Supplementary material
Source: PubMed Central journal article supplement (PMC9308469)
Supplement: NIHMS1798362-supplement-2.pdf [file NIHMS1798362-supplement-2.pdf]

# Figure S1

**A**

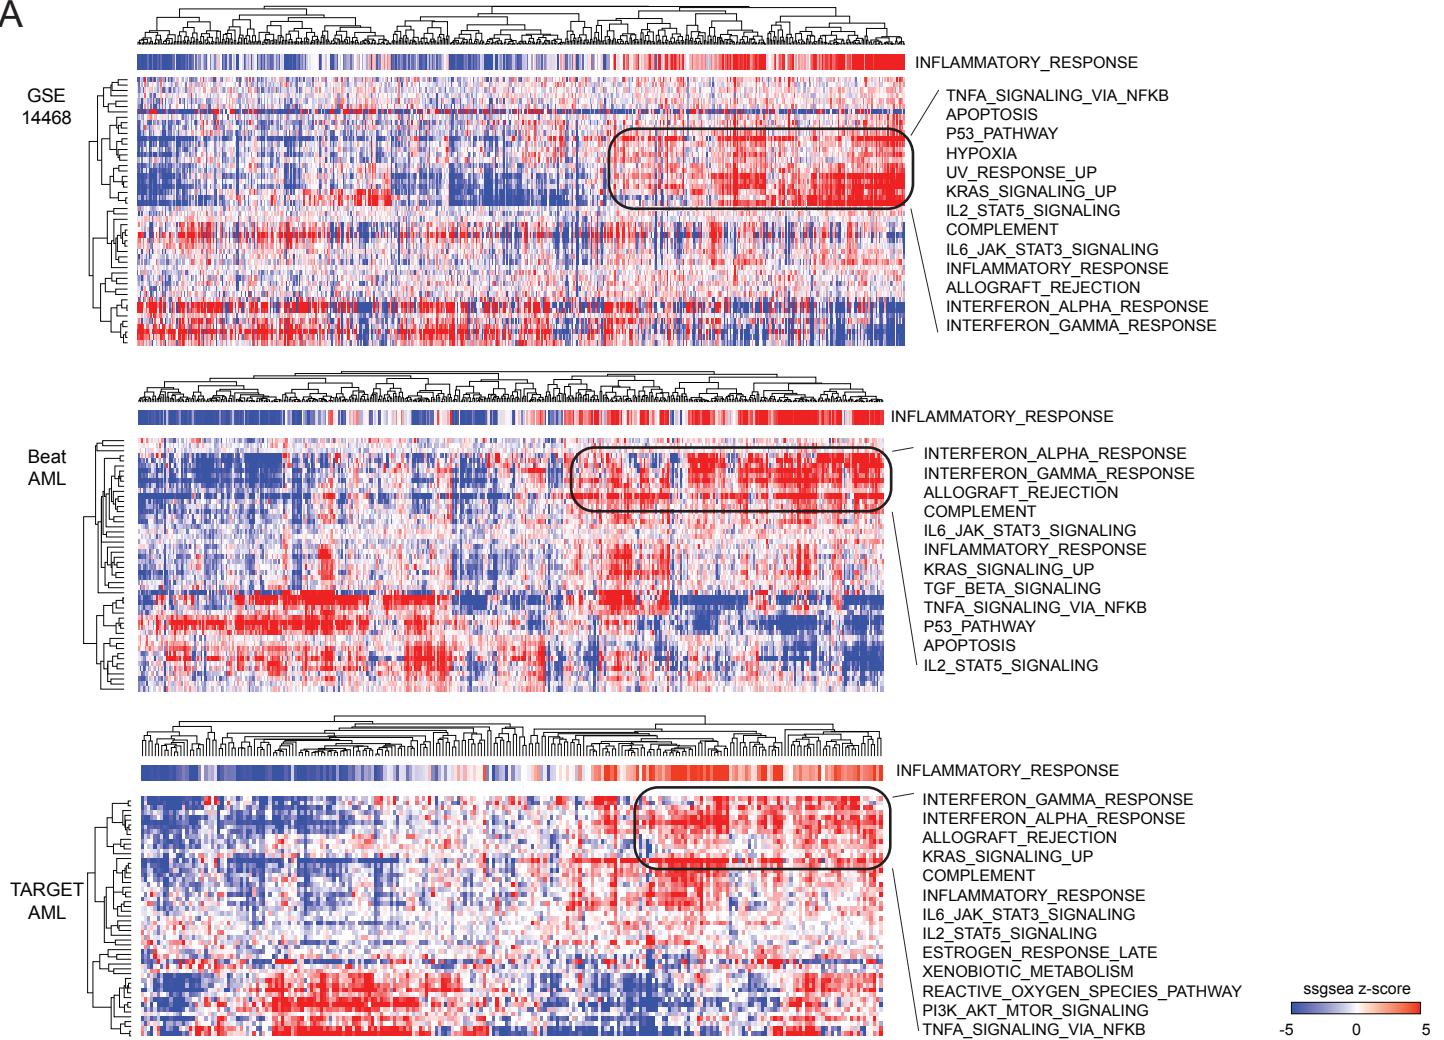

**B**

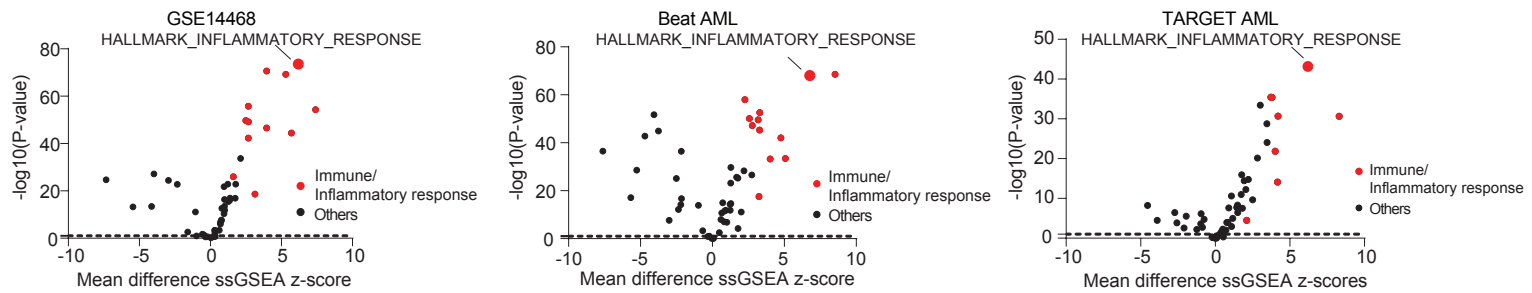

**D**

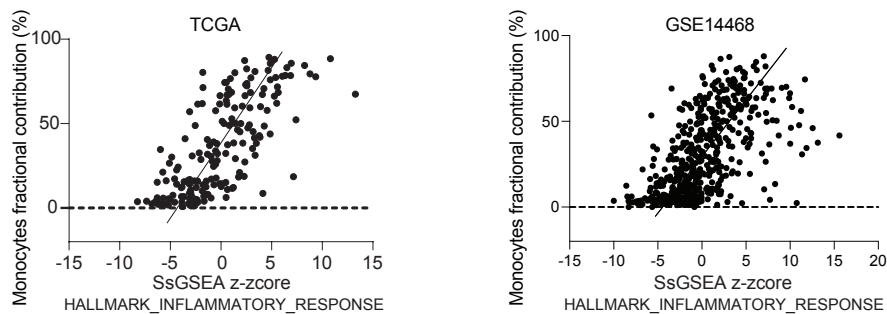

**C**

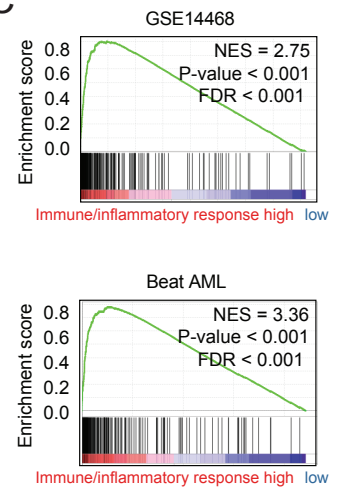

**E**

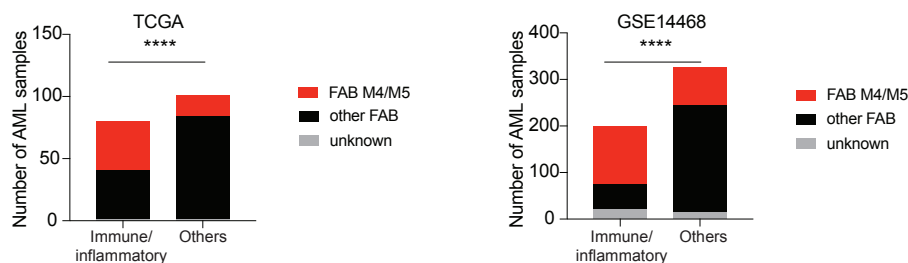

# Figure S1

F

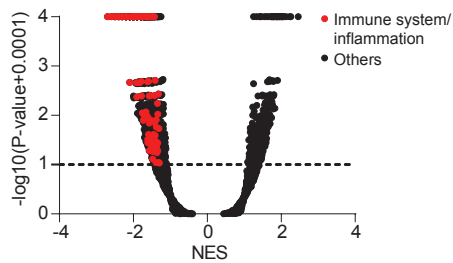

G

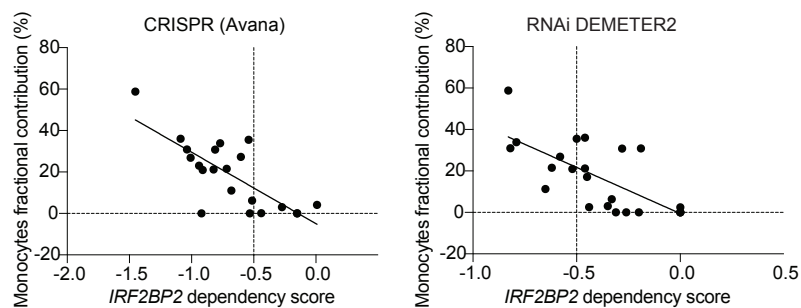

H

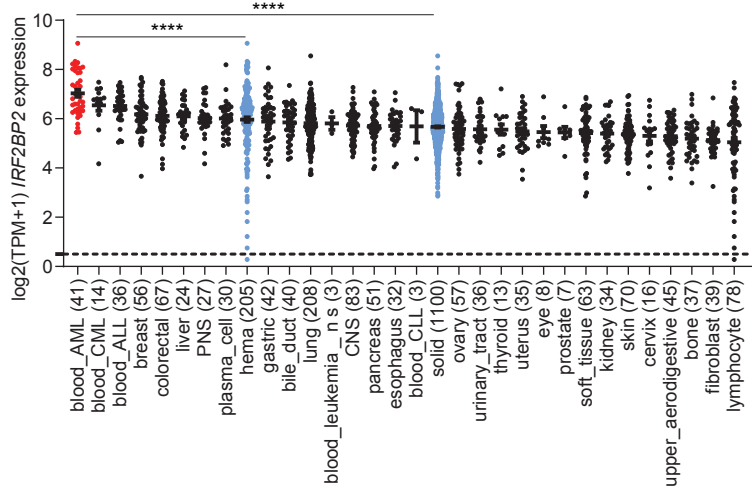

I

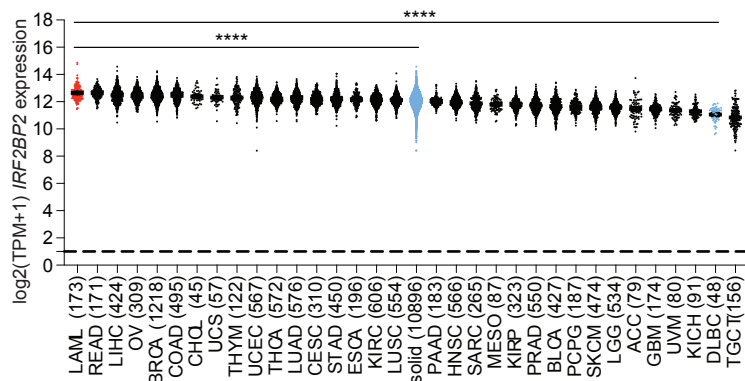

J

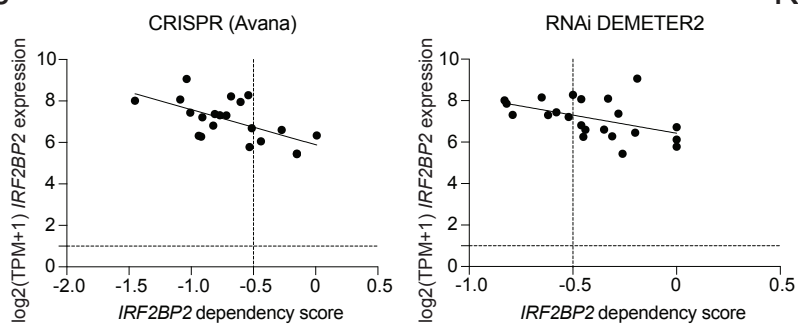

K

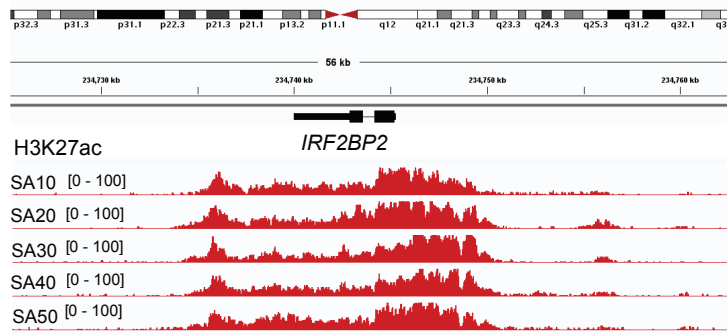

L

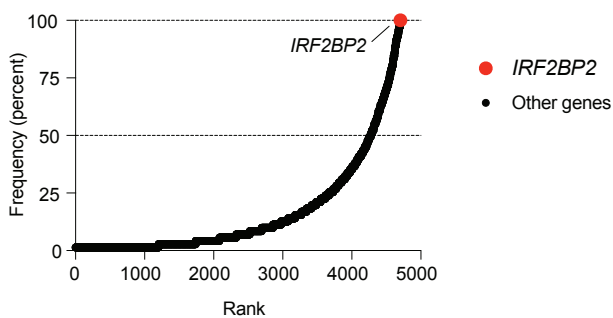

**Figure S1. GSEA identifies an AML group enriched for inflammatory pathways across independent patient sample collections**

**A**, Heatmaps depicting the single sample GSEA (ssGSEA) projection of the GSE14468 expression data for 526 AML samples (top panel), the Beat AML data for 451 AML samples (middle panel) and the TARGET AML expression data for 232 AML samples (bottom panel) on the collection of 50 hallmark gene sets (MSigDB v7.0), defining a cluster of AML samples enriched for immune/ inflammatory pathways. AML samples are annotated with the ssGSEA scores for HALLMARK\_INFLAMMATORY\_RESPONSE. Data are clustered according to the hierarchical clustering for Spearman rank correlation. Top scoring hallmark gene sets within the cluster with strong enrichment for immune/ inflammatory response are listed next to the heatmap.

**B**, Volcano plot depicting the differential enrichment of the ssGSEA projection on hallmark gene sets for AML samples enriched for immune/ inflammatory pathways (defined as shown in panel A) compared to all other AML samples within the GSE14468 collection (left panel), the Beat AML study (middle panel), and the TARGET AML data set (right panel). Highlighted in red are the immune/ inflammatory hallmark gene sets. Limma eBayes,  $|\text{effect size}| \geq 0.5$ ,  $p\text{-value} \leq 0.10$ .

**C**, GSEA plot for HALLMARK\_INFLAMMATORY\_RESPONSE enrichment in the genome-wide list of genes ranked by differential expression in AML samples enriched for immune/ inflammatory pathways (defined as shown in panel A) compared to all other AML samples within the GSE14468 (upper panel) and the Beat AML collection (lower panel).  $\text{NES} \geq 1.3$ ,  $p\text{-value} \leq 0.05$ ,  $\text{FDR} \leq 0.25$ .

**D**, Scatter plot depicting the correlation between the HALLMARK\_INFLAMMATORY\_RESPONSE ssGSEA z-scores and the monocytic lineage enrichment (%) per AML sample within the TCGA LAML data (Pearson R = 0.72;  $p < 0.0001$ ; left panel) and within the GSE14468 sample collection (Pearson R = 0.62;  $p < 0.0001$ ; right panel).

**E**, Barplots depicting the number of AML samples divided into FAB M4/M5, other FAB or unknown with enrichment for immune/ inflammatory pathways compared to all other AML samples within the TCGA LAML collection (left panel) and GSE14468 (right panel).

**F**, Volcano plot depicting the GSEA in the genome-wide differential CERES dependency scores for AML cell lines compared to all other cancer cell lines within the CRISPR (Avena) 20Q3 data (789 cell lines) within the GOBP (Gene Ontology Biological Process) gene set collection (MSigDB v7.0). Gene sets classified as immune system/ inflammation related are highlighted red.

**G**, Scatter plots depicting the negative linear associations between IRF2BP2 dependency scores and the monocytic lineage enrichment (%) across AML cell lines within the CRISPR (Avena) dependency data (Pearson R = - 0.76;  $p < 0.0001$ ; left panel) and the RNAi DEMETER2 dependency data (Pearson R = - 0.70;  $p < 0.0001$ ; right panel).

**H**, Boxplots depicting the *IRF2BP2* log<sub>2</sub>(TPM+1) expression scores across the 32 lineages in the CCLE 20Q3 data on 1,305 cell lines. The number of cell lines per lineage is indicated in parentheses. Lineages are ranked by average *IRF2BP2* expression scores. AML cell lines are highlighted in red. Differential expression was tested using one-way ANOVA, Tukey's multi-comparisons test, \*\*\*\*  $p < 0.0001$ .

**I**, Boxplots depicting the *IRF2BP2* log<sub>2</sub>(TPM+1) expression scores across the 34 lineages in the panTCGA data on 11,069 tumors (sample identifiers:

<http://gdac.broadinstitute.org>). The number of samples per lineage is indicated in parentheses. Lineages are ranked by the average *IRF2BP2* expression scores. AML samples (LAML) are highlighted in red. Differential expression was assessed using one-way ANOVA, Tukey's multi-comparisons test, \*\*\*\*  $p < 0.0001$ .

**J**, Scatter plots depicting the linear associations between IRF2BP2 dependency scores and *IRF2BP2* expression across AML cell lines within the CRISPR (Avena) dependency data (Pearson  $R = -0.51$ ; not significant; left panel) and the RNAi DEMETER2 dependency data (Pearson  $R = -0.47$ ; not significant; right panel).

**K**, Integrative Genomics Viewer (IGV) tracks depicting the H3K27ac super-enhancer mark in the *IRF2BP2* genomic region in five exemplary samples from a study collection of 71 samples from patients with AML (32).

**L**, Hockey stick plot depicting the frequency of the 4704 super-enhancer nearest gene targets across the collection of H3K27ac super-enhancers identified for the 71 AML patient samples from the McKenow et al. collection. *IRF2BP2* has a 100% frequency as it is a super-enhancer target gene for each of the AML samples in the data set.
