# Supplementary material
Source: PubMed Central journal article supplement (PMC9308469)
Supplement: NIHMS1798362-supplement-3.pdf [file NIHMS1798362-supplement-3.pdf]

Figure S2

A

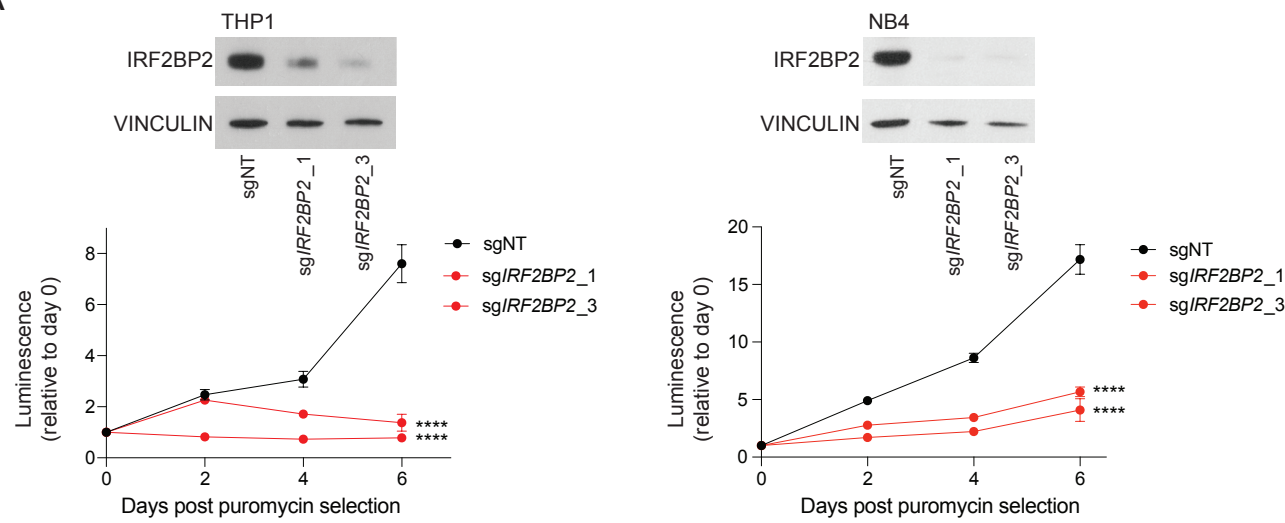

B

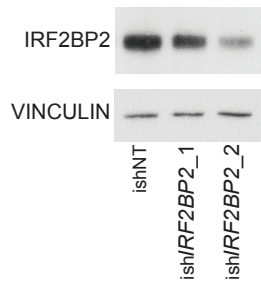

C

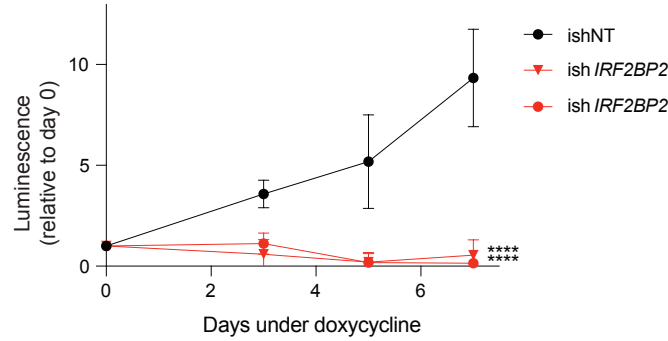

D

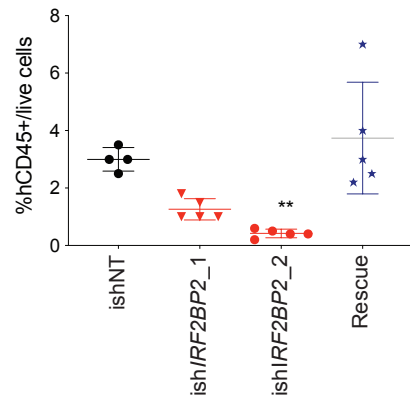

**Figure S2. Knock-down of *IRF2BP2* reduces viability of AML cells in vitro and in vivo**

**A**, Upper panels: Western blot analysis showing IRF2BP2 protein levels after CRISPR knock-out with two CRISPR guides in THP1 and NB4 cells post puromycin selection; vinculin was used as a loading control. Lower panels: CellTiter-Glo viability assay in THP1 and NB4 cells following lentiviral infection with two CRISPR guides against *IRF2BP2* (sg*IRF2BP2*\_1 and sg*IRF2BP2*\_3) and one non-targeting control guide (sgNT). Two-way ANOVA, \*\*\*\*  $p < 0.0001$ .

**B**, Western blot analysis showing IRF2BP2 protein levels in MV4-11 cells infected with control (ishNT) or *IRF2BP2*-targeting (ish*IRF2BP2*\_1 and ish*IRF2BP2*\_2) doxycycline-inducible hairpins 72 hours post doxycycline treatment; vinculin was used as a loading control.

**C**, CellTiter-Glo viability assay in MV4-11 cells, infected with non-targeting- or *IRF2BP2*-targeting doxycycline-inducible hairpins. Two-way ANOVA, \*\*\*\*  $p < 0.0001$ .

**D**, Flow cytometry analysis for hCD45+ cells/live cells on peripheral blood samples of all mice included in the study ( $n = 4$  to 5 animals per study group; every symbol represents one animal). One-way ANOVA, Dunnett's multiple comparison test, \*\*  $p < 0.01$ .
