# Supplementary material
Source: PubMed Central journal article supplement (PMC9308469)
Supplement: NIHMS1798362-supplement-4.pdf [file NIHMS1798362-supplement-4.pdf]

Figure S3

A

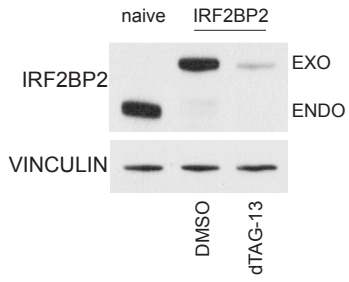

B

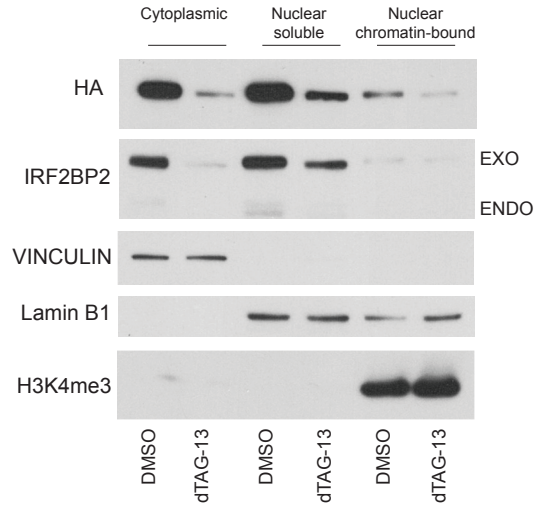

C

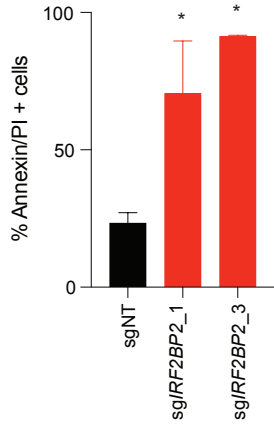

D

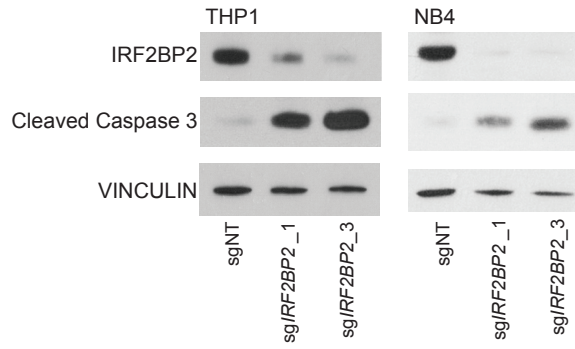

E

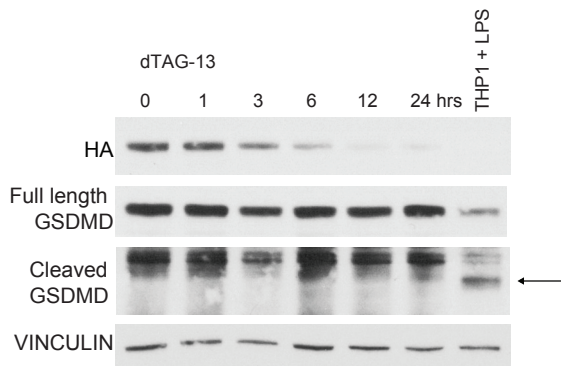

F

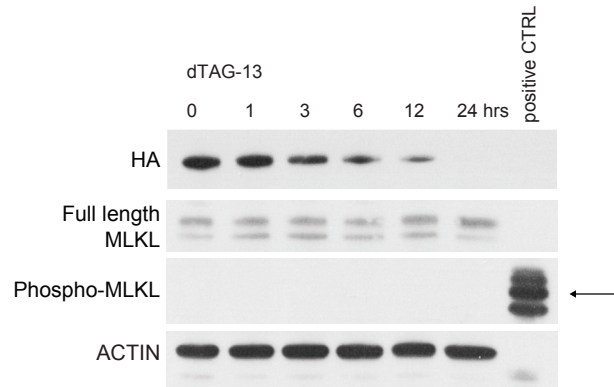

**Figure S3. IRF2BP2 is degraded in all cellular compartments and its perturbation leads to Annexin/PI-positive cells**

**A,** Western blot analysis showing endogenous and exogenous IRF2BP2 expression in naïve MV4-11 cells or MV4-11 cells with a degradable N-terminally tagged FKBP12<sup>F36V</sup>-HA-*IRF2BP2*-fusion and knockout of endogenous *IRF2BP2*, treated with DMSO or dTAG-13 for 24 hours.

**B,** Western blot analysis showing HA and IRF2BP2 following degradation of IRF2BP2 for 24 hours in the cytoplasmic, nuclear soluble and nuclear chromatin-bound fractions. Vinculin, lamin B1 and H3K4me3 serve as markers of the cellular fractions and loading controls.

**C,** Quantification of flow-cytometry experiments in MV4-11 cells infected with control guide (sgNT) or hairpins against IRF2BP2 (sg*IRF2BP2*\_1 and sg*IRF2BP2*\_3) detecting Annexin V/PI + cells. One-way ANOVA, Dunnett's multiple comparison test, \*  $p < 0.05$ .

**D,** Western blot analysis for cleaved caspase 3 in THP1 (left) and NB4 (right) cells transduced with a non-targeting control CRISPR guide (sgNT) or *IRF2BP2*-targeting sgRNAs. Vinculin was used as a loading control.

**E,** Western blot analysis for (cleaved) Gasdermin D (GSDMD) in MV4-11 cells over 24 hours with degradation of IRF2BP2. LPS-treated THP1 cells were used as positive control. HA antibody was used to detect IRF2BP2. Vinculin was used as a loading control.

**F,** Western blot analysis for (phospho)MLKL in MV4-11 cells over 24 hours with degradation of IRF2BP2. Positive control phospho-MLKL lysate was purchased and used following the manufacturers protocol (see methods section).
