# Supplementary material
Source: PubMed Central journal article supplement (PMC9308469)
Supplement: NIHMS1798362-supplement-5.pdf [file NIHMS1798362-supplement-5.pdf]

Figure S4

A

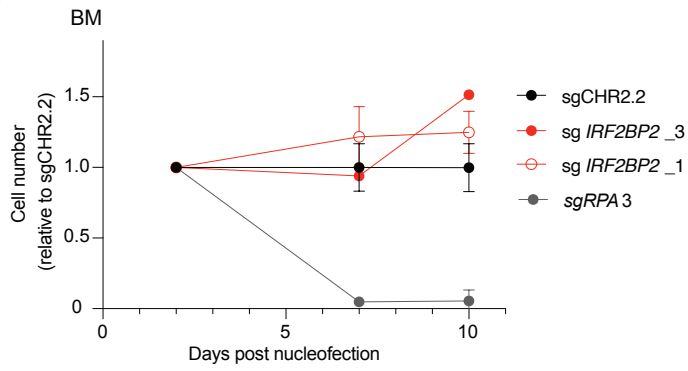

B

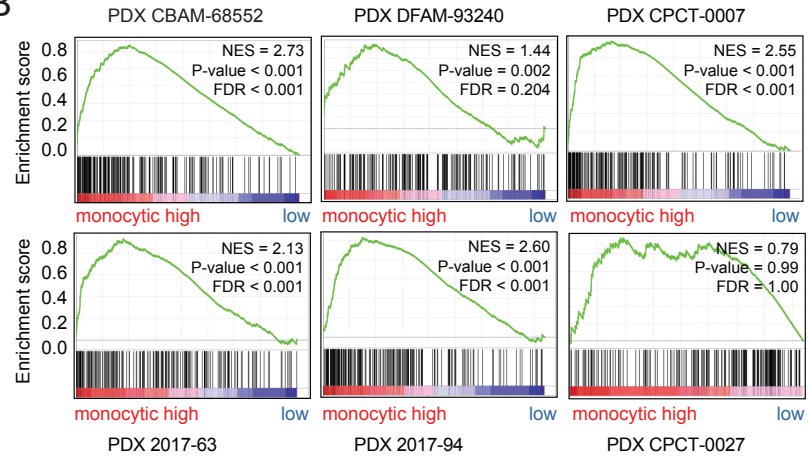

C

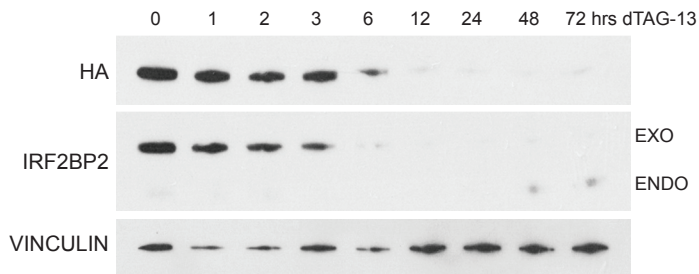

D

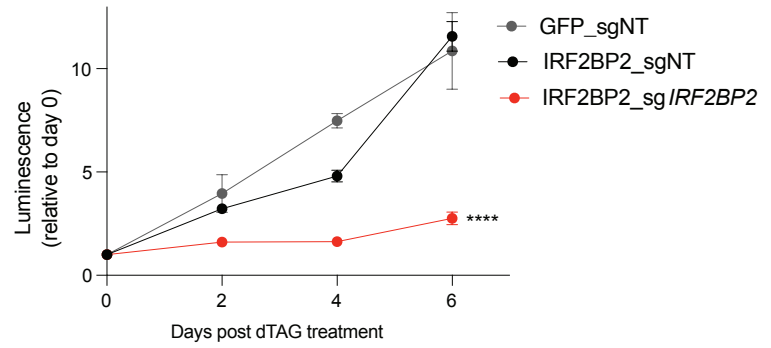

E

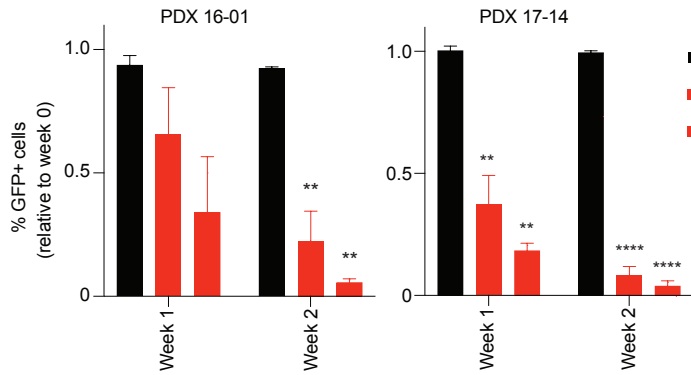

F

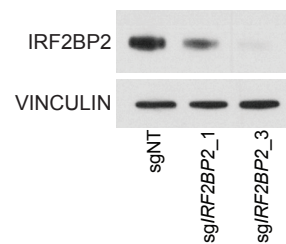

G

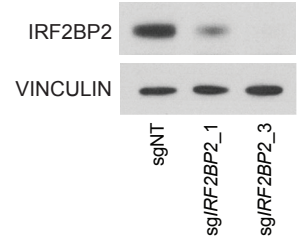

H

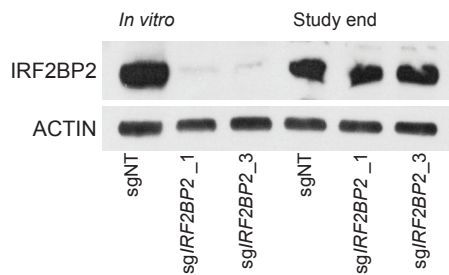

**Figure S4. Knock-down of *IRF2BP2* in PDX cells reduces leukemia burden**

**A**, Serial cell counting of hCD34+ bone marrow cells nucleofected with synthetic *IRF2BP2*-targeting guides, a non-targeting control guide or a positive control guide targeting an essential gene (*RPA3*).

**B**, GSEA for human monocytic lineage gene markers (35) run per individual PDX sample on the genome-wide genes ranked by  $\log_2(\text{TPM}+1)$  expression. NES  $\geq 1.3$ , p-value  $\leq 0.05$ , FDR  $\leq 0.25$ .

**C**, Western blot analysis of a time-course experiment showing *IRF2BP2* protein levels following treatment with dTAG-13 in PDX 16-01 cells with a degradable N-terminally tagged FKBP12<sup>F36V</sup>-HA-*IRF2BP2*-fusion and knock-out of endogenous *IRF2BP2*. Vinculin was used as a loading control.

**D**, CellTiter-Glo viability assay in PDX 16-01 cells overexpressing a GFP CTRL-ORF or an *IRF2BP2* N-dTAG-construct, double-infected with non-targeting (sgNT) or CRISPR guide targeting endogenous *IRF2BP2* (sg*IRF2BP2*) following treatment with 500 nM dTAG-13. Two-way ANOVA, \*\*\*\* p < 0.0001.

**E**, Flow cytometry for GFP in PDX16-01 (left) and PDX17-14 cells (right) infected with GFP-marked sgNT, or sg*IRF2BP2* on the day of doxycycline-induction and at one and two weeks. One-way ANOVA, Dunnett's multiple comparison test (per week), \*\* p < 0.01, \*\*\*\* p < 0.0001.

**F**, Western blot analysis from the model PDX 16-01 infected with doxycycline-inducible non-targeting CRISPR guides (sgNT), or CRISPR guides against *IRF2BP2* (sg*IRF2BP2*\_1, sg*IRF2BP2*\_3) four days after doxycycline-induction of *IRF2BP2* knock-out. Vinculin was used as a loading control.

**G**, Western blot analysis from the model PDX 17-14 infected with doxycycline-inducible non-targeting CRISPR guides (sgNT), or CRISPR guides against *IRF2BP2* (sg*IRF2BP2\_1*, sg*IRF2BP2\_3*) four days after doxycycline-induction of *IRF2BP2* knock-out. Vinculin was used as a loading control.

**H**, Western blot analysis from the model PDX 17-14 infected with doxycycline-inducible non-targeting CRISPR guides (sgNT), or CRISPR guides against *IRF2BP2* (sg*IRF2BP2\_1*, sg*IRF2BP2\_3*) in cells treated with doxycycline *in vitro* as a control for knock-out with this system and in bone marrow cells of the respective *in vivo* recipients at study end. Actin was used as a loading control.
