# Supplementary material
Source: PubMed Central journal article supplement (PMC9308469)
Supplement: NIHMS1798362-supplement-7.pdf [file NIHMS1798362-supplement-7.pdf]

Figure S6

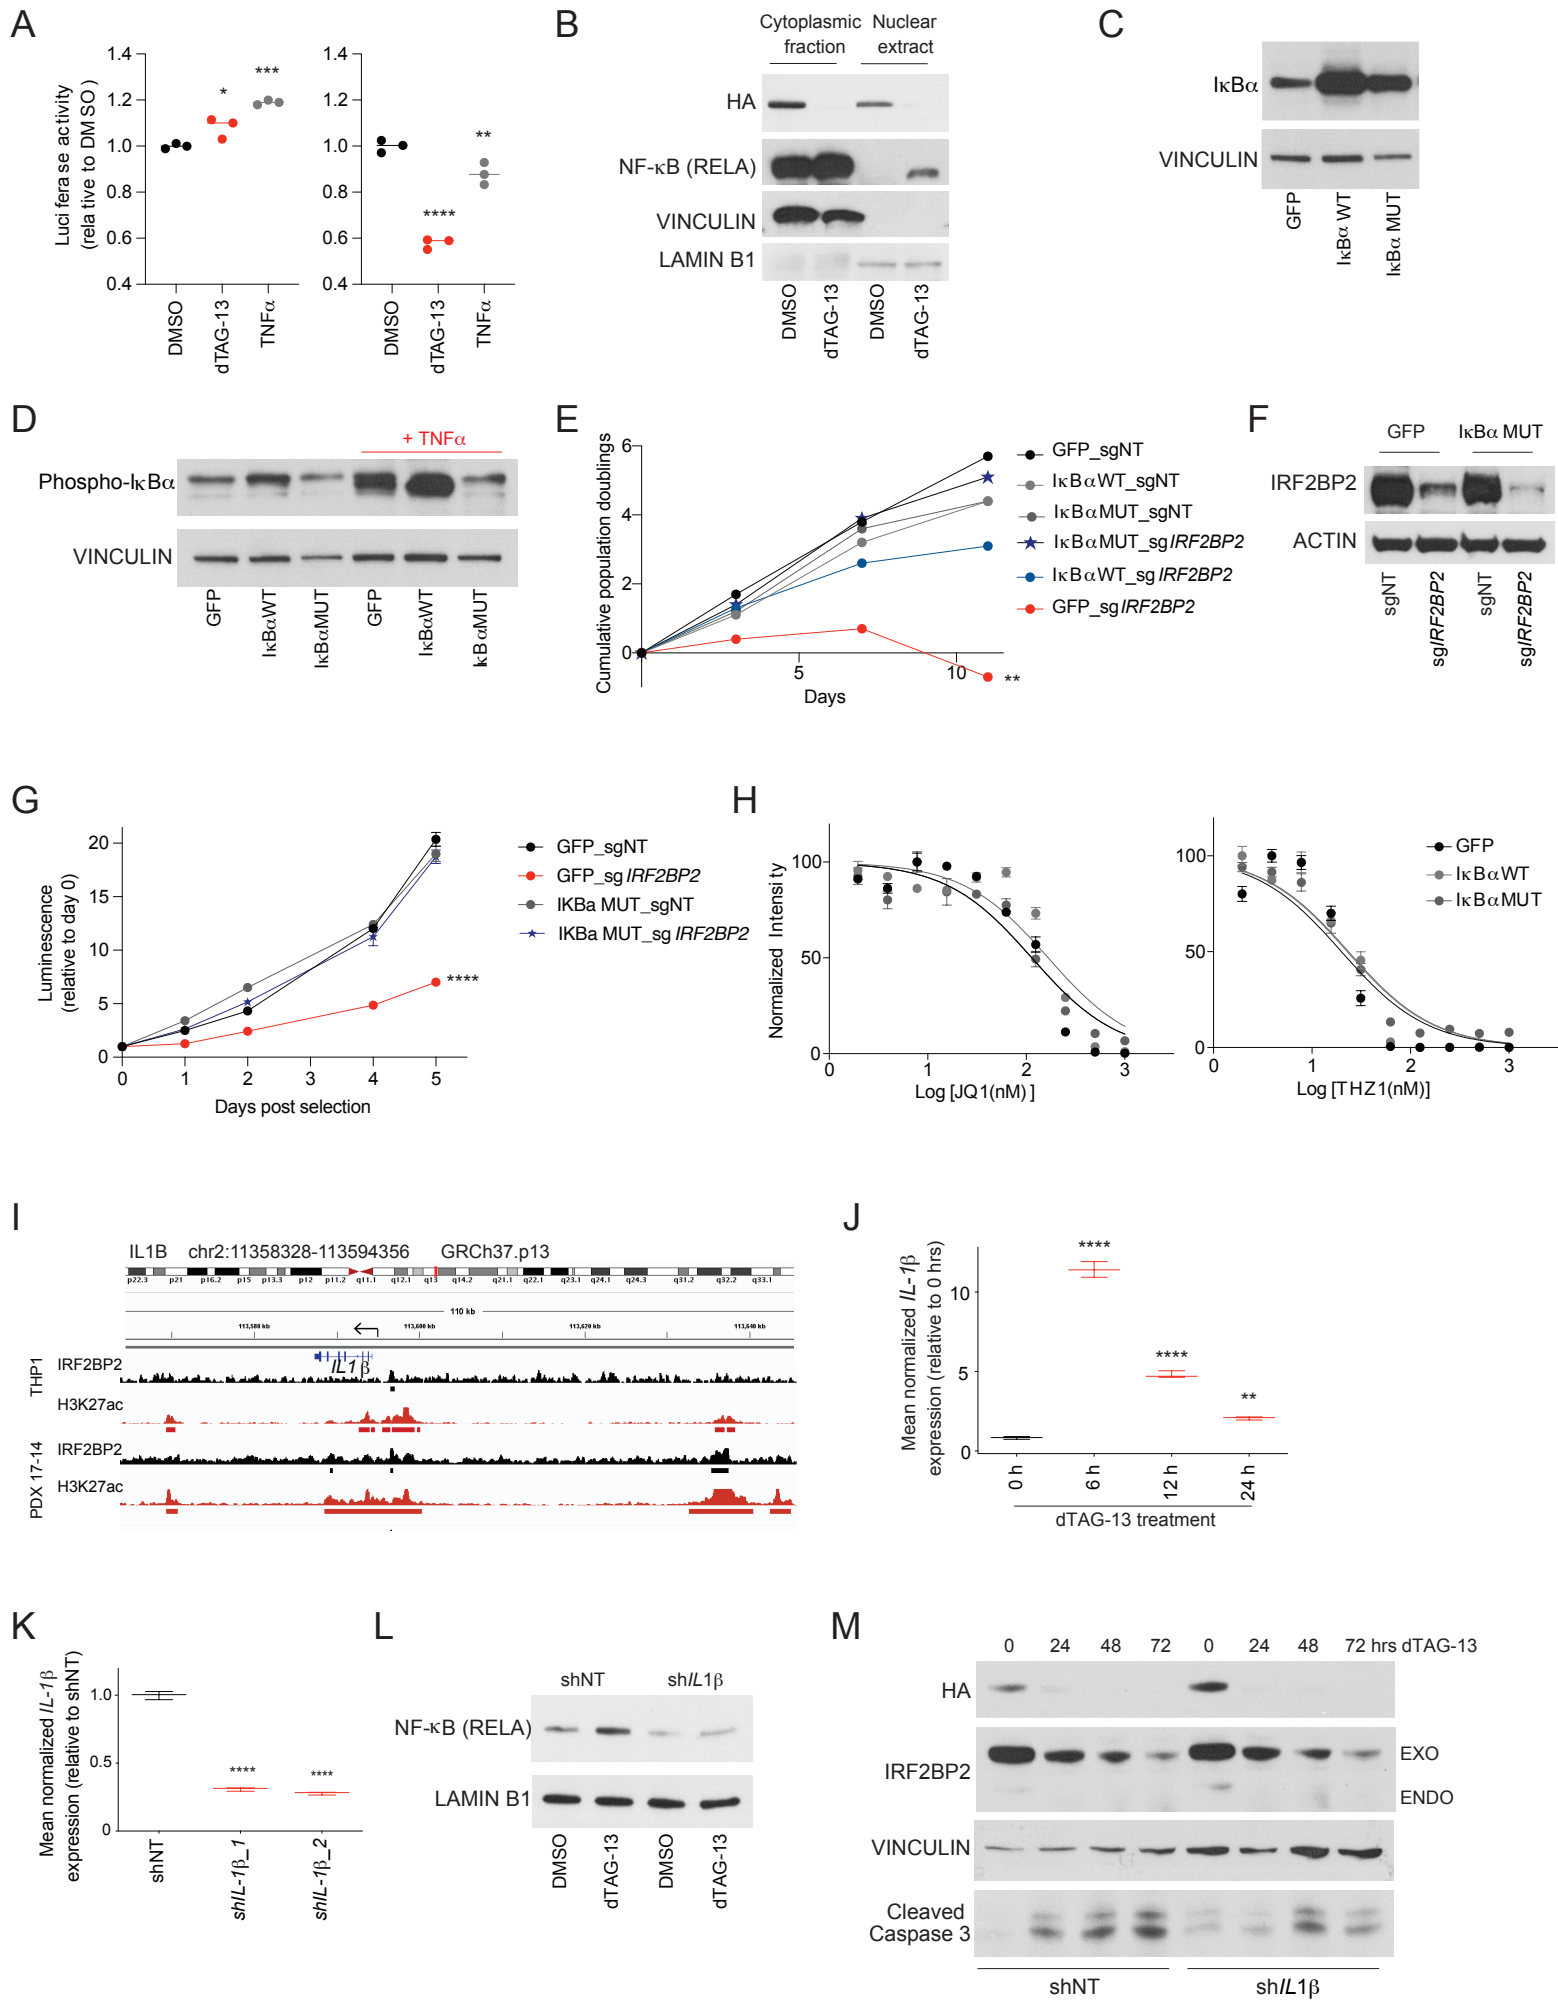

Figure S6

N

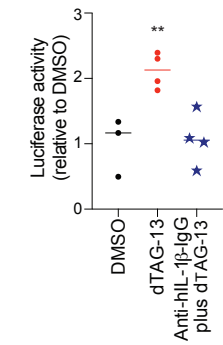

O

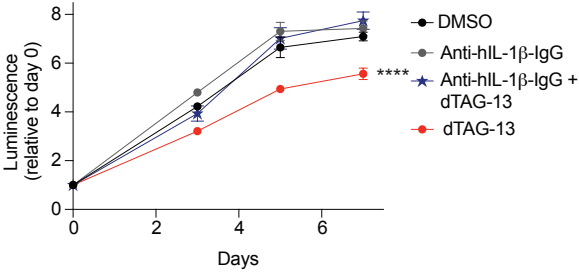

P

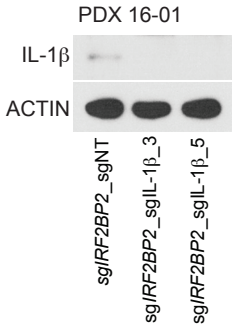

Q

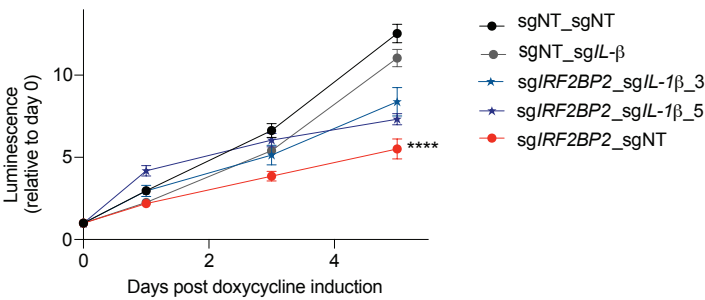

## Figure S6. IRF2BP2 controls NF- $\kappa$ B signaling

**A**, NF- $\kappa$ B reporter assay in MV4-11 cells with degradable IRF2BP2 and NF- $\kappa$ B reporter showing luciferase activity following treatment with dTAG-13 for 24 hours (left panel) and 72 hours (right panel) relative to the luminescence signal of cells treated with DMSO. TNF $\alpha$  was used as a positive CTRL. One-way ANOVA, Dunnett's multiple comparison test, \*\*\*\*  $p < 0.0001$ , \*\*\*  $p < 0.001$ , \*\*  $p < 0.01$ , \*  $p < 0.05$ .

**B**, Western blot analysis showing NF- $\kappa$ B protein (RELA) in the cytoplasmic fraction and nuclear extracts following degradation of IRF2BP2 after treating PDX 16-01 cells with degradable IRF2BP2 with dTAG-13 for 24 hours. Vinculin indicates the cytoplasmic fraction; lamin B1 is found in nuclear extracts.

**C**, Western blot analysis for I $\kappa$ B $\alpha$  showing overexpression of GFP control ORF, I $\kappa$ B $\alpha$  WT or I $\kappa$ B $\alpha$  MUT in MV4-11 cells. Vinculin was used as a loading control.

**D**, Western blot analysis for phospho-I $\kappa$ B $\alpha$  in MV4-11 cells showing overexpression of GFP control ORF, I $\kappa$ B $\alpha$  WT or I $\kappa$ B $\alpha$  MUT after treatment with TNF $\alpha$  for 5 minutes or exposure to the solvent H<sub>2</sub>O. Vinculin was used as a loading control.

**E**, Cumulative population doublings over time assessed by serial cell counting of MV4-11 cells expressing GFP control ORF, I $\kappa$ B $\alpha$  WT or I $\kappa$ B $\alpha$  MUT plus control guide (sgNT) or *IRF2BP2* CRISPR guide (sg*IRF2BP2*). Differential analysis for best-fitted exponential growth curves based on the extra sum of squares (F-test), \*\*  $p < 0.01$ .

**F**, Western blot analysis for IR2BP2 protein in PDX 17-14 cells overexpressing plx317 GFP control ORF (GFP) or plx317 I $\kappa$ B $\alpha$ (S32A/S36A) (I $\kappa$ B $\alpha$ MUT), double-infected with either non-targeting CRISPR guide (sgNT), or sg*IRF2BP2*.

**G**, Viability assay in PDX 17-14 cells overexpressing plx317 GFP control ORF or plx317 I $\kappa$ B $\alpha$ (S32A/S36A), double-infected with either non-targeting CRISPR guide (sgNT), or an *IRF2BP2* targeting guide (sg*IRF2BP2*). Two-way ANOVA, \*\*\*\*  $p < 0.0001$ .

**H**, Viability assay in MV4-11 cells expressing GFP control ORF, I $\kappa$ B $\alpha$  WT or I $\kappa$ B $\alpha$  MUT treated with increasing concentrations of JQ1 (upper graph) or THZ1 (lower graph) for 72 hours.

**I**, Integrated genomics viewer plots (GRCh37/hg19) showing IRF2BP2 and H3K27ac ChIP-seq RPKM binding signal in the IL-1 $\beta$  neighborhood region in THP1 cells and PDX 17-14.

**J**, Quantitative PCR showing mean normalized (to 0 hours) *IL-1 $\beta$*  expression of at 6, 12 and 24 hours post degradation of IRF2BP2 in MV4-11 cells. One-way ANOVA, Dunnett's multiple comparison test, \*\*\*\*  $p < 0.0001$ , \*\*  $p < 0.01$ .

**K**, Quantitative PCR showing mean normalized (to shNT) *IL-1 $\beta$*  expression in MV4-11 cells with degradable IRF2BP2 infected with *IL-1 $\beta$*  targeting hairpins. One-way ANOVA, Dunnett's multiple comparison test, \*\*\*\*  $p < 0.0001$ .

**L**, Western blot analysis for NF- $\kappa$ B (RELA) of nuclear extracts from cellular fractionation in MV4-11 cells with degradable IRF2BP2 and control hairpin or knock-down of *IL-1 $\beta$* .

**M**, Western blot analysis for HA, IRF2BP2, vinculin, and cleaved caspase 3 in MV4-11 cells with degradable IRF2BP2 and non-targeting shRNA (shNT) or shRNA against *IL-1 $\beta$*  in a time course experiment from 0 to 72 hours after degradation of IRF2BP2.

**N**, NF- $\kappa$ B reporter assay in MV4-11 cells with degradable IRF2BP2 and NF- $\kappa$ B reporter pre-treated with anti-hIL-1 $\beta$ -IgG or the solvent H<sub>2</sub>O, showing luciferase activity following

treatment with dTAG-13 for 6 hours relative to the luminescence signal of cells treated with DMSO. One-way ANOVA, Dunnett's multiple comparison test, \*\*  $p < 0.01$ .

**O**, CellTiter-Glo viability assay in MV4-11 cells with degradable IRF2BP2 in MV4-11 cells upon exposure to DMSO, anti-hIL-1 $\beta$ -IgG or dTAG-13 (following pre-treatment with anti-hIL-1 $\beta$ -IgG for 12 hours). Two-way ANOVA, \*\*\*\*  $p < 0.0001$ .

**P**, Western blot analysis for IL-1 $\beta$  in PDX 16-01 cells transduced with an *IRF2BP2*-targeting sgRNA plus a sgRNA targeting *IL-1 $\beta$*  (*sgIL1 $\beta$ \_3/5*) or a non-targeting control sgRNA (sgNT). Actin was used as a loading control.

**Q**, CellTiter-Glo viability assay in PDX 16-01 double transduced with non-targeting control guides (sgNT\_sgNT), non-targeting control guide and *IL-1 $\beta$* -targeting guide (sgNT\_sg/*IL-1 $\beta$ \_5*), or knockout of *IRF2BP2* (sg/*IRF2BP2*\_sgNT), or double knockout of *IRF2BP2* and *IL-1 $\beta$*  (sg/*IRF2BP2*\_sg/*IL-1 $\beta$ \_3/5*). Two-way ANOVA, \*\*\*\*  $p < 0.0001$ .
